# Supplementary material
Source: Springer Nature journal article supplement (https://www.springermedizin.de/resource/supplementary/12865_2010_342_MOESM13_ESM.pdf/9427792)

# Immunoglobulin M

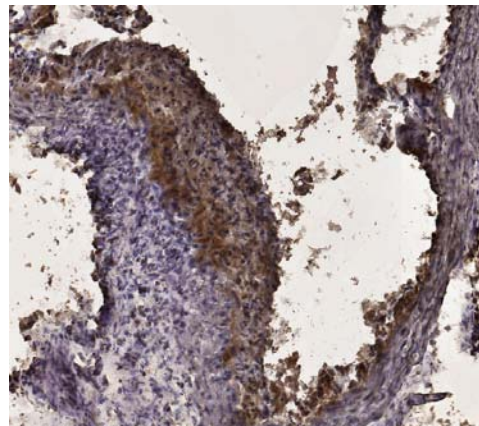

**Chow 4 weeks**

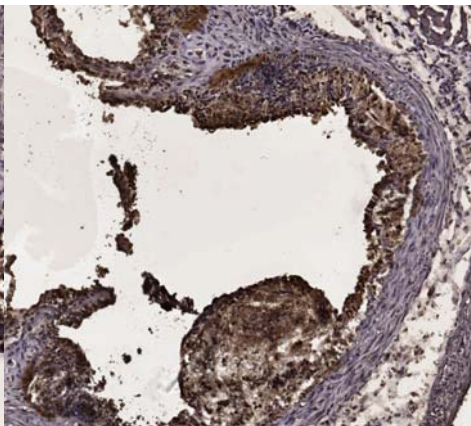

**HFD 4 weeks**

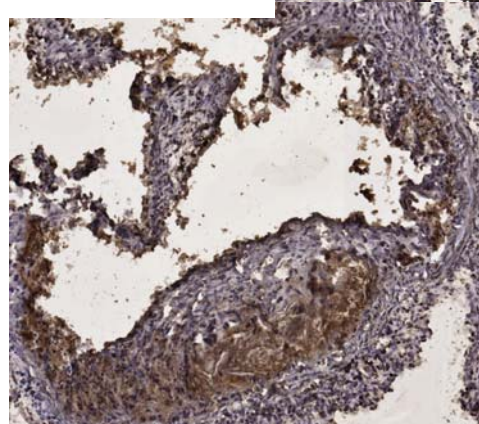

**Chow 8 weeks**

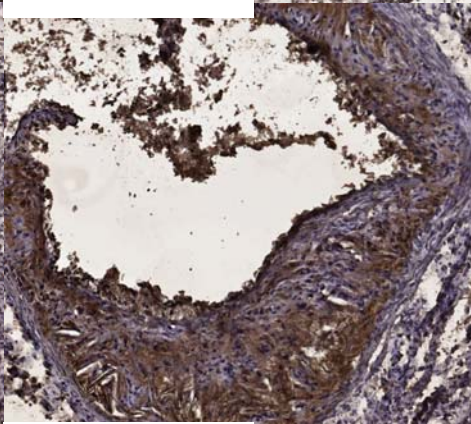

**HFD 8 weeks**

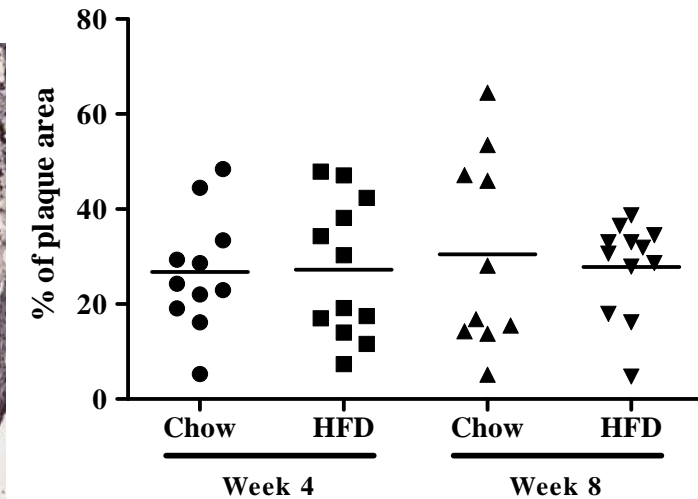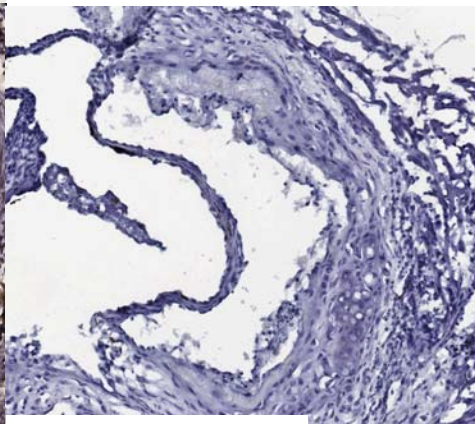

**Negative control**

Supplement: MOESM13 [file 9427792]
